1 **Research article: Risk Factors for Traumatic Brain Injury in Men and Women**

2 Running title: Recent Epidemiological Research Advances

3

4 **Authors' list: Basheer Abdullah Marzoog<sup>1,\*</sup>, Ekaterina Vanichkina<sup>2</sup>**

5 <sup>1</sup> World-Class Research Center «Digital Biodesign and Personalized Healthcare», I.M. Sechenov

6 First Moscow State Medical University (Sechenov University), 119991 Moscow, Russia; postal  
7 address: Russia, Moscow, 8-2 Trubetskaya street, 119991.

8

9 <sup>2</sup> National Research Ogarev Mordovia State University

10

11 \*Corresponding author: Basheer Abdullah Marzoog, Ph.D. student at Sechenov First Moscow  
12 State Medical University at the World-Class Research Center "Digital biodesign and  
13 personalized healthcare". (marzug@mail.ru, +79969602820). Address: Russia, Moscow, 8-2  
14 Trubetskaya street, 119991. Postal address: Russia, Moscow, 8-2 Trubetskaya street, 119991.  
15 ORCID: 0000-0001-5507-2413, Scopus ID: 57486338800

16

17 Competing interests: No competing interests regarding the publication.

18

19

20

21

22

23

24

25

26

27

28

29

30

31

32

33

34 **Abstract**

35 **Objectives:** The study covers the current status of TBI and provides a statistical recommendation  
36 to health organizations in the world.

37 **Design:** A retrospective analytical study. The descriptive results showed that a difference exists  
38 between males and females and for these reasons the sample was divided into two groups  
39 according to the primary descriptive statistics. The first group included 212 (31.59 %) females,  
40 while the second group included 459 (68.40%) males.

41 **Setting:** Assess the risk factors for TBI in both sexes and compare them with the results of  
42 international studies.

43 **Participants:** The study involved 671 patients for the period from 07/01/2017- 17/12/2018. The  
44 primary data were collected from the republic hospital.

45 **Interventions:** Retrospectively analysed these patients using T test, one- and two-way ANOVA  
46 test, and the Pearson correlation test using the Statistica 12 program. The study divided into male  
47 and female by using the ROC and AUC values.

48 **Main Outcome Measures:** The most frequently reported cause of TBI in men and women is  
49 domestic accidents. Men are affected by TBI in early life compared to women.

50 **Results:** The mean age of the men is 44.41 years (Std. error 0.75). The mean age of the women  
51 is 49.50 years (Std. error 1.38). In the male group, 354 (77.12 %) patients live in the city and 105  
52 (22.87%) live in the village. However, in the female group, 170 (80.18%) patients live in the city  
53 and 42 (19.81%) live in the village. In the men group, 172 (37.47%) patients had TBI due to  
54 domestic accidents. The most frequently reported etiology of TBI in women is domestic  
55 accident, reported in 122 (57.54 %). In female group, the mean age of patients with domestic  
56 accident associated TBI is 53.76 years (Std. error 1.85). In male group, the mean age of patients  
57 with domestic accident associated TBI is 50.74 years (Std. error 1.09). Total hospitalization days  
58 of the patients were associated with the age of the patients,  $r= 0.12$ . Where men are hospitalized  
59 longer than women,  $t$  value  $-2.261$ ,  $p < 0.024$ . In the male and female groups, there is a direct  
60 correlation between age and the total hospitalization days in the male group,  $r=0.173$ ;  $r=0.148$ ,  
61 respectively.

62 **Conclusion:** The most frequently reported cause of TBI in men and women is domestic  
63 accidents. Men are affected by TBI in early life compared to women.

64 **Keywords:** Traumatic brain Injury; Surgery; Risk factor; Gender; Epidemiology; Glasgow coma  
65 scale

66

67

68

## 69 **Background**

70 Traumatic brain injury is reported in multiple studies, and it is suggested that gender plays an  
71 important role in post-TBI outcomes [1]. A recent multicenter study concluded that gender plays  
72 an important role in the severity of TBI using the Glasgow coma scale (GCS) score [2].  
73 Traumatic brain injury can be contusion and concussion, and penetrating wound injury as well as  
74 anoxic brain injuries.

75 Several factors play a role in the determination of the risk of TBI in men and women, such as  
76 age, hormonal status, and the presence of poor health care practice [3,4]. The classical causes of  
77 TBI include car accidents, falls from hills, sport associated injuries, and domestic violence [5].  
78 The domestic violence is the primary cause of TBI and post TBI outcomes and complications  
79 [6].

80 Traumatic brain injury clinical manifestations are severity-dependent and age-dependent.  
81 Various sensory symptoms, physical symptoms, and cognitive, behavioral, or mental symptoms  
82 [7].

83 The dramatic increase in the number of traumatic brain injuries exposes the community to a high  
84 prevalence of disability associated with TBI associated disability[8]. Therefore, TBI is an  
85 emergency and requires urgent action to reduce the incidence rate of TBI occurrence [9]. The  
86 study sought to determine the risk factors most frequently reported for TBI occurrences.

## 87 **Methods**

88 A retrospective analytical study involved 671 patients for the period of 07/01/2017- 17/12/2018.  
89 The primary data were collected from the republic hospital for the past 2 year and retrospectively  
90 analyzed. The descriptive results showed that a difference exists between males and females and  
91 for these reasons the sample was divided into two groups according to the primary descriptive  
92 statistics. The first group included 212 (31.59 %) females, while the second group included 459  
93 (68.40%) males. The consent of the patients has been taken for scientific purposes to analyze and  
94 publish the results of the study. The study divided into male and female by using the ROC and  
95 AUC values. (*Figure 1*)

96 For statistical analysis, the T test, one- and two-way ANOVA test, and the Pearson correlation  
97 test were used using the Statistica program. (StatSoft, Inc. (2011). STATISTICA (data analysis  
98 software system), version 10. [www.statsoft.com](http://www.statsoft.com)).

## 99 **Results**

100 The descriptive statistical analysis showed that the mean age of the participants is 46.016 years  
101 old (min; max: 15.00; 92.00). The mean hospitalization days ranged from 0.00 - 49.00 days  
102 (mean; Std. Error: 12.75; 0.26). The study involved 212 (31.59 %) women and 459 (68.40%)  
103 men. The demographic distribution of the sample included 524 (78.09 %) who live in the city

104 and 147 (21.90%) who live in the village. The frequency of traumatic brain injury (TBI) due to  
105 alcohol-related brain injury is observed in 139 (20.71%) patients, due to criminal injury 75  
106 (11.17%) patients, due to domestic accident 294 (43.81%) patients, due to work injury 16  
107 (2.38%) patients, due to motor vehicle injury 111 (16.54 %) patients, due to postoperative  
108 haematoma 2 (0.29%) patients, due to convulsive syndrome 7 (1.043%) patients, due to sports  
109 injury 2 (0.29%) patients, due to unknown reason 25 (3.72%) patients. Number of the patients  
110 required blood transfusion is 3 (0.44%) and 668 (99.55%) required only conservative therapy.  
111 Of 671, the need for surgical treatment was observed in 198 (39.91%) patients, missing data in  
112 181 (26.97%), and 292 (43,51%) did not require surgical intervention. Out of 198, 125 (63.13%)  
113 patients required surgical debridement of wounds. 42 (21.32%) patients required skull  
114 trepanation with removal of acute subdural hematoma. 6 (3.03 %) patients required skull  
115 trepanation and removal of acute epidural haematoma. 8 (4.12%) patients required skull  
116 trepanation and removal of chronic subdural hematoma. 4 (2.03 %) patients required skull  
117 trepanation and removal of acute intracerebral haematoma. 3 (1.54 %) patients required skull  
118 trepanation and osteoplasty of fracture. 3 (1.52 %) patients required osteoplasty of fracture. 4  
119 (2.03%) patients required Bulau pleural drainage. 1 (0.50 %) patient required surgical  
120 debridement of wounds and pleural drainage by Bulau. 2 (1.01%) patients required skull  
121 trepanation and removal of acute subdural haematoma with removal of acute intracerebral  
122 hematoma.

123 The mean age of patients affected by TBI who live in the city is 47.101 years. The mean age of  
124 the patients affected by TBI who live in the village is 42.14 years. The people who live in the  
125 village are at increased risk of TBI, t value 3.02971,  $p < 0.002$ .

126 Total hospitalization days of the patients were associated with the age of the patients,  $r = 0.12$ .  
127 Where men are hospitalized longer than women, t value -2.26,  $p < 0.024$ .

128 Mean age of patients with alcohol-related brain injury is 46.079 years (Std. error 1.17). Mean age  
129 of patients with domestic accident is 50.74 years (Std. error 1.098). Mean age of patients with  
130 motor vehicle-related injury is 38.072 years (Std. error 1.68). The mean age of patients with  
131 criminal injury is 37.94 years (Std. error 1.59). The mean age of patients with work injury is  
132 41.75 years (Std. error 3.081). The mean age of patients with convulsive syndrome is 50.142  
133 years (Std. error 5.65). The mean age of patients with postoperative haematoma is 55.00 years  
134 (Std. error 2.00). Mean age of patients with sports injury is 26 years (Std. error 0.00). The mean  
135 age for patients with TBI of unknown reasons is 52.04 years (Std. error 2.77).

136 In terms of gender-dependent risk factors, men are frequently exposed to domestic accidents as a  
137 risk factor for the development of TBI. In the men group, 172 (37.47 %) patients had TBI due to

138 domestic accidents. However, the mean hospitalization days of these patients was 13.30 (Std.  
139 error 0.56).

140 The mean age of the men is 44.41 years (Std. error 0.75). The mean age of the women is 49.50  
141 years (Std. error 1.38). Indicates that men are affected by TBI at an early age compared to  
142 women, t value 3.50,  $p < 0.0004$ . (Figure 2)

143 In the male group, 354 (77.12 %) patients live in the city and 105 (22.87%) live in the village.  
144 However, in the female group, 170 (80.18%) patients live in the city and 42 (19.81%) live in the  
145 village.

146 The most frequently reported etiology of TBI in women is domestic accident, reported in 122  
147 (57.54 %). However, the most frequently reported cause of TBI in males is domestic accident  
148 too. (Figure 3)

149 In the male group, the frequency of domestic accident-associated TBI seen in 172(37.47 %)   
150 patients, alcohol-related brain injury-associated TBI in 122 (26.57 %) patients, motor vehicle-  
151 related injury associated TBI in 68 (14.81 %) patients, criminal injury associated TBI in 56  
152 (12.20 %) patients, work injury associated TBI in 13 (2.83 %) patients, convulsive syndrome-  
153 associated TBI in 5 (1.089 %) patients, sports injury associated TBI in 2 (0.43%) patients,  
154 postoperative haematoma-associated TBI in 1 (0.21 %), and unknown reason in 20 (4.35 %)   
155 patients. In the female group, domestic accidents were reported in 122 (57.54 %) patients, motor  
156 vehicle injury reported in 43 (20.28%) patients, criminal injury reported in 19 (8.96%) patients,  
157 alcohol-related brain injury reported in 17 (8.018%) patients, work injury reported in 3 (1.41 %)   
158 patients, convulsive syndrome reported in 2 (0.94340 %) patients, postoperative hematoma  
159 reported in 1 (0.47%) patient and unknown reason seen in 5 (2.35 %) patients.

160 In the male group, 458 (99.78 %) patients required conservative therapy and 1 (0.21%) required  
161 blood transfusion. However, in the female group, 210 (99.05 %) required conservative surgery  
162 and 2 (0.94 %) were treated without conservative therapy.

163 In male group, the mean age of patients with alcohol-related brain injury is 46.079 years (Std.  
164 error 1.17). The mean age of patients with TBI associated with domestic accidents is 50.74 years  
165 (Std. error 1.098). The mean age of patients with motor vehicle injury-associated TBI is 38.072  
166 years (Std. error 1.68). Mean age of patients with criminal injury associated TBI is 37.94 years  
167 (Std. error 1.59). Mean age of patients with work injury associated TBI is 41.75 years (Std. error  
168 3.081). The mean age of patients with convulsive syndrome associated TBI is 50.14 years (Std.  
169 error 5.65). The mean age of patients with sports injury-associated TBI is 26 years (Std. error  
170 0.00). The mean age of patients with postoperative haematoma-associated TBI is 57 years (Std.  
171 error 0.00). The mean age of patients with unknown reason associated TBI is 52.04 years (Std.  
172 error 2.77). In the female group, the mean age of patients with alcohol-related brain injury is

173 43.52 years (Std. error 3.63). The mean age of patients with domestic accident-associated TBI is  
 174 53.76 years (Std. error 1.85). Mean age of patients with motor vehicle-related injury associated  
 175 TBI is 40.30 years (Std. error 3.069). Mean age of patients with criminal injury associated TBI is  
 176 37.94 years (Std. error 1.59). Mean age of patients with work injury associated TBI is 45.33  
 177 years (Std. error 4.17). The mean age of patients with convulsive syndrome associated TBI is  
 178 57.5 years (Std. error 5.50). The mean age of patients with sports injury-associated TBI is 26  
 179 years (Std. error 0.00). The mean age of patients with postoperative haematoma-associated TBI  
 180 is 53 years (Std. error 0.00). The mean age of patients with unknown reason is 61.20 years (Std.  
 181 error 6.39).

182 In male group, out of 459 patients with TBI, 158 (46.19%) required surgical treatment and 184  
 183 (53.80%) resolved without surgical treatment, missing data in 117 (25.54%) patients. Of 158  
 184 patients, 3 (1.89%) required fracture osteoplasty. 94 (59.49%) patients required surgical  
 185 debridement of the wounds. 11 (6.96%) required skull trepanation and removal of chronic  
 186 subdural haematoma. 1 (0.63%) required skull trepanation with removal of acute subdural  
 187 hematoma. 38 (24.05%) required skull trepanation and removal of acute subdural hematoma. 2  
 188 (1.26%) required skull trepanation with fracture osteoplasty. 1 (0.63%) required surgical  
 189 debridement of wounds with pleural drainage by Bulau. 5 (3.16%) required skull trepanation  
 190 with removal of acute epidural haematoma. 3 (1.89%) required skull trepanation with removal of  
 191 acute intracerebral haematoma. 2 (1.26%) required skull trepanation and removal of acute  
 192 subdural haematoma, as well as removal of acute intracerebral hematoma. In the female group,  
 193 out of 212 patients, 40 (18.87% ) patients required surgical treatment, missing data in 64 (30.18  
 194 %) patients. Of 40, 31 (77.50%) patients required surgical debridement of wounds, 4 (10.00%)  
 195 required skull trepanation with removal of acute subdural haematoma, 1 (2.50%) required skull  
 196 trepanation with removal of acute epidural haematoma, 2 (5.00%) required skull trepanation with  
 197 removal of chronic subdural haematoma, 1 (2.50%) required skull trepanation with removal of  
 198 acute intracerebral haematoma, and 1 (2.50%) required skull trepanation with fracture  
 199 osteoplasty. (Table 1)

200 Table 1: Non parametric characteristics of the sample.

| Factor               | Index   | Group M (%)    | Group F (%)   | X <sup>2</sup> | P value |
|----------------------|---------|----------------|---------------|----------------|---------|
| Sex                  | M       | 459 (100.00 %) | 0 (0.00 %)    | 671.000        | <0,001  |
|                      | F       | 0 (0.00 %)     | 212 (100.00%) |                |         |
| Living place         | City    | 354 (77,12 %)  | 170 (80,18 %) | 0.796          | 0.373   |
|                      | Village | 105 (22,87 %)  | 42 (19,81 %)  |                |         |
| Conservative therapy | Yes     | 458 (99,78 %)  | 210 ( )       | 0.373          | 0.191   |

|  |                   |            |            |  |  |
|--|-------------------|------------|------------|--|--|
|  |                   |            | 99,05 %)   |  |  |
|  | Blood transfusion | 1 (0,21 %) | 2 (0,94 %) |  |  |

201

202 In the male group, the mean hospitalization days for patients with TBI who live in the city are  
 203 12.83 days and 14.29 days for patients who live in the village. In the female group, the mean  
 204 hospitalization day is 11.87 days (Std. error 0.40). However, in the female group, the mean days  
 205 for TBI patients living in the city are 11.79 days and 12.19 days for patients living in the village.  
 206 The Mean total hospitalization days of patients with alcohol-related brain injury is 12.00 days  
 207 (Std. error 1.85). The mean total hospitalization of patients with domestic accidents is 12.64 days  
 208 (Std. error 0.40). The mean total hospitalization of patients with motor vehicle-related injury is  
 209 13.53 days (Std. error 0.66). The mean total hospitalization of patients with criminal injury is  
 210 9.026 days (Std. error 0.61). The mean total hospitalization of patients with work injury is 12.81  
 211 days (Std. error 2.029). The mean total hospitalization of patients with convulsive syndrome is  
 212 15.71 days (Std. error 3.037). The mean total hospitalization of patients with sports injuries is 8.5  
 213 days (Std. error 3.50). The mean total hospitalization of patients with postoperative hematoma is  
 214 16.50 days (Std. error 3.50). The mean total hospitalization of patients for unknown reason is  
 215 15.00 days (Std. error 1.34).

216 In the male group, the mean total hospitalization days of patients with alcohol-related brain  
 217 injury is 14.09 days (Std. error 0.62). The mean total hospitalization of patients with domestic  
 218 accidents is 13.30 days (Std. error 0.56). The mean total hospitalization of patients with motor  
 219 vehicle-related injury is 13.92 days (Std. error 0.94). The mean total hospitalization of patients  
 220 with criminal injury is 9.17 days (Std. error 0.76). The mean total hospitalization of patients  
 221 with work injury is 12.30 days (Std. error 2.47). The mean total hospitalization of patients with  
 222 convulsive syndrome is 15.4 days (Std. error 4.38). The mean total hospitalization for sports  
 223 injuries is 8.5 days (standard error 3.5). The mean total hospitalization of patients with  
 224 postoperative haematoma is 8.5 days (Std. error 3.50). The mean total hospitalization of patients  
 225 for unknown reason is 15.4 days (Std. error 1.62). In the female group, the mean total  
 226 hospitalization days of patients with alcohol-related brain injury is 12.00 days (Std. error 1.85).  
 227 The mean total hospitalization of patients with domestic accident is 11.71 days (Std. error 0.55).  
 228 The mean total hospitalization of patients with motor vehicle-related injury is 12.90 days (Std.  
 229 error 0.85). The mean total hospitalization of patients with criminal injury is 8.57 days (Std. error  
 230 0.85). The mean total hospitalization of patients with work injury is 15.00 days (Std. error 1.73).  
 231 The mean total hospitalization of patients with convulsive syndrome is 15.4 days (Std. error  
 232 4.38). The mean total hospitalization days of patients with sports injury is 8.5 days (Std. error  
 233 3.5). The mean total hospitalization of patients with postoperative haematoma is 8.5 days (Std.

234 error 3.50). The mean total hospitalization of patients for unknown reason is 13.40 days (Std.  
235 error 1.80).

236 In the male group, the mean age of patients with TBI who live in the city is 44.85 years and  
237 42.92 years for patients who live in the village. Whereas, in the female group, the mean age of  
238 patients with TBI who lives in the city is 51.79 years old and 40.21 years old for patients living  
239 in the village, statically significant difference in the age of the TBI female patients, t value 3.42,  
240  $p < 0.0007$ . (Figure 4)

241 In the male and female groups, there is a direct correlation between age and the total  
242 hospitalization days,  $r=0.17$ ;  $r=0.14$ , respectively.

### 243 **Discussion**

244 The city population affected by TBI in older age in compare to village citizens. The total  
245 hospitalization days are longer in men than in women. Longer hospitalization days are observed  
246 in older people. Living in the village posses' higher risk of TBI, probably due to the lack of  
247 primary health care facilities. Men are affected by TBI in early life compared to women. The  
248 frequency of TBI causes is associated with the age of the patients. Consuming alcohol is a huge  
249 risk factor for TBI. Poor hygienic practice and bad habits such as heavy alcohol drinking are  
250 avoidable risk factors.

251 The limitation of a study is the absence of the control group to compare the incidence rate  
252 between men and women. The outcomes of post TBI depend on the gender [2,10–18]. Different  
253 studies suggested that age plays a central role in increasing the risk of TBI [19]. In particular,  
254 women under 45 years of age and older than 65 years of age are at increased risk than men of the  
255 same age [10]. Furthermore, being a male, the risk factor for TBI is two times higher as being a  
256 woman. However, a noticeable increase in the incidence rate of TBI in women is observed  
257 compared to previous studies [20,21]. Probably associated with women's increase in the  
258 participation in different kinds of contact sports (such as rugby), military services, and home  
259 violence [5,22–25].

### 260 **Conclusions**

261 The most frequently reported cause of TBI in men and women is domestic accidents. Men are  
262 affected by TBI in early life compared to women. The people who live in the village are at  
263 increased risk of TBI. Gender plays a crucial role in the severity and incidence rate of post-TBI  
264 outcomes and complications. The results of our study expand the knowledge in the field of  
265 traumatic brain injury risk factors in a gender-dependent manner. Also, the results of our study  
266 are in constant with the results of the previous studies [15,17,26,27].

### 267 **List of abbreviations**

268 TBI; traumatic brain injury



## 269 **Declarations**

- 270 1. Ethics approval and consent to participate: The study approved by the National Research  
271 Mordovia State University, Russia, from “Ethics Committee Requirement N8/2 from  
272 30.06.2022”.
- 273 2. Consent for publication: Written informed consent was obtained from the participants for  
274 publication of study results and any accompanying images.
- 275 3. Availability of data and materials: applicable on reasonable request.
- 276 4. Competing interests: The authors declare that they have no competing interests regarding  
277 publication.
- 278 5. Funding’s: The work of **Basheer Abdullah Marzoog** was financed by the Ministry of  
279 Science and Higher Education of the Russian Federation within the framework of state  
280 support for the creation and development of World-Class Research Center ‘Digital  
281 biodesign and personalized healthcare’ № 075-15-2022-304.
- 282 6. Authors' contributions: MB is the writer, researcher, collected and analyzed data, and  
283 revised the manuscript, EV collected the primary data from the hospital. All authors have  
284 read and approved the manuscript.
- 285 7. Acknowledgments: not applicable
- 286 8. Authors' information: **Basheer Abdullah Marzoog**, Research Center «Digital Biodesign  
287 and Personalized Healthcare», I.M. Sechenov First Moscow State Medical University  
288 (Sechenov University), 119991 Moscow, Russia; postal address: Russia, Moscow, 8-2  
289 Trubetskaya street, 119991. (marzug@mail.ru, +79969602820). ORCID: 0000-0001-5507-  
290 2413. Scopus ID: 57486338800. **Ekaterina Vanichkina**, National Research Ogarev  
291 Mordovia State University. ORCID: 0009-0006-3015-2306
- 292 9. The paper has not been submitted elsewhere

## 293 **References**

- 294 1. Mac Donald CL, Barber J, Jordan M, Johnson AM, Dikmen S, Fann JR, et al. Early clinical  
295 predictors of 5-year outcome after concussive blast traumatic brain injury. *JAMA Neurol.*  
296 *American Medical Association*; 2017;74:821–9.
- 297 2. Eom KS, Kim JH, Yoon SH, Lee S jong, Park KJ, Ha SK, et al. Gender differences in adult  
298 traumatic brain injury according to the Glasgow coma scale: A multicenter descriptive study.  
299 *Chinese J Traumatol [Internet]. Elsevier*; 2021 [cited 2022 Aug 10];24:333. Available from:  
300 [/pmc/articles/PMC8606602/](#)
- 301 3. Ma C, Wu X, Shen X, Yang Y, Chen Z, Sun X, et al. Sex differences in traumatic brain injury:  
302 a multi-dimensional exploration in genes, hormones, cells, individuals, and society. *Chinese*  
303 *Neurosurg J [Internet]. 2019*;5:24. Available from:

- 304 <https://cnjournal.biomedcentral.com/articles/10.1186/s41016-019-0173-8>
- 305 4. Biegon A. Considering Biological Sex in Traumatic Brain Injury. *Front Neurol*. *Frontiers*  
306 *Media S.A.*; 2021;12:39.
- 307 5. Monahan K, Goldfine A, Biegon A. Traumatic brain injuries in victims of intimate partner  
308 violence: an underappreciated source of neurological morbidity. *Future Neurol* [Internet].  
309 2017;12:189–91. Available from: <https://www.futuremedicine.com/doi/10.2217/fnl-2017-0026>
- 310 6. James SL, Theadom A, Ellenbogen RG, Bannick MS, Montjoy-Venning W, Lucchesi LR, et  
311 al. Global, regional, and national burden of traumatic brain injury and spinal cord injury, 1990–  
312 2016: a systematic analysis for the Global Burden of Disease Study 2016. *Lancet Neurol*  
313 [Internet]. 2019;18:56–87. Available from:  
314 <https://linkinghub.elsevier.com/retrieve/pii/S1474442218304150>
- 315 7. McMahon P, Hricik A, Yue JK, Puccio AM, Inoue T, Lingsma HF, et al. Symptomatology  
316 and functional outcome in mild traumatic brain injury: Results from the prospective TRACK-  
317 TBI study. *J Neurotrauma*. 2014;31:26–33.
- 318 8. Lasry O, Liu EY, Powell GA, Ruel-Laliberté J, Marcoux J, Buckeridge DL. Epidemiology of  
319 recurrent traumatic brain injury in the general population. *Neurology* [Internet]. 2017;89:2198–  
320 209. Available from: <https://www.neurology.org/lookup/doi/10.1212/WNL.0000000000004671>
- 321 9. Albrecht JS, Hirshon JM, McCunn M, Bechtold KT, Rao V, Simoni-Wastila L, et al.  
322 Increased Rates of Mild Traumatic Brain Injury Among Older Adults in US Emergency  
323 Departments, 2009-2010. *J Head Trauma Rehabil* [Internet]. 2016;31:E1–7. Available from:  
324 <https://journals.lww.com/00001199-201609000-00008>
- 325 10. Mikolić A, van Klaveren D, Oude Groeniger J, Wiegers EJA, Lingsma HF, Zeldovich M, et  
326 al. Differences between Men and Women in Treatment and Outcome after Traumatic Brain  
327 Injury. *J Neurotrauma* [Internet]. 2020;neu.2020.7228. Available from:  
328 <https://www.liebertpub.com/doi/10.1089/neu.2020.7228>
- 329 11. Gupte RP, Brooks WM, Vukas RR, Pierce JD, Harris JL. Sex Differences in Traumatic Brain  
330 Injury: What We Know and What We Should Know. *J Neurotrauma* [Internet]. 2019;36:3063–  
331 91. Available from: <https://www.liebertpub.com/doi/10.1089/neu.2018.6171>
- 332 12. Rosene JM, Raksnis B, Silva B, Woefel T, Visich PS, Dompier TP, et al. Comparison of  
333 Concussion Rates Between NCAA Division I and Division III Men’s and Women’s Ice Hockey  
334 Players. *Am J Sports Med* [Internet]. 2017;45:2622–9. Available from:  
335 <http://journals.sagepub.com/doi/10.1177/0363546517710005>
- 336 13. Colvin AC, Mullen J, Lovell MR, West RV, Collins MW, Groh M. The role of concussion  
337 history and gender in recovery from soccer-related concussion. *Am J Sports Med*.  
338 2009;37:1699–704.

- 339 14. Covassin T, Elbin RJ, Harris W, Parker T, Kontos A. The role of age and sex in symptoms,  
340 neurocognitive performance, and postural stability in athletes after concussion. *Am J Sports*  
341 *Med.* 2012;40:1303–12.
- 342 15. Styrke J, Sojka P, Björnstig U, Bylund PO, Stålnacke BM. Sex differences in symptoms,  
343 disability and life satisfaction three years after mild traumatic brain injury: A populationbased  
344 cohort study. *J Rehabil Med.* 2013;45:749–57.
- 345 16. Lippa SM, Brickell TA, Bailie JM, French LM, Kennedy JE, Lange RT. Postconcussion  
346 Symptom Reporting after Mild Traumatic Brain Injury in Female Service Members: Impact of  
347 Gender, Posttraumatic Stress Disorder, Severity of Injury, and Associated Bodily Injuries. *J*  
348 *Head Trauma Rehabil.* Lippincott Williams and Wilkins; 2018;33:101–12.
- 349 17. Yue JK, Levin HS, Suen CG, Morrissey MR, Runyon SJ, Winkler EA, et al. Age and sex-  
350 mediated differences in six-month outcomes after mild traumatic brain injury in young adults: a  
351 TRACK-TBI study. *Neurol Res.* Taylor and Francis Ltd.; 2019;41:609–23.
- 352 18. Yu W-Y, Hwang H-F, Lin M-R. Gender Differences in Personal and Situational Risk Factors  
353 for Traumatic Brain Injury Among Older Adults. *J Head Trauma Rehabil* [Internet].  
354 2022;37:220–9. Available from: <https://journals.lww.com/10.1097/HTR.0000000000000708>
- 355 19. Varriano B, Tomlinson G, Tarazi A, Wennberg R, Tator C, Tartaglia MC. Age, Gender and  
356 Mechanism of Injury Interactions in Post-Concussion Syndrome. *Can J Neurol Sci.* Cambridge  
357 University Press; 2018;45:636–42.
- 358 20. Roos KG, Wasserman EB, Dalton SL, Gray A, Djoko A, Dompier TP, et al. Epidemiology of  
359 3825 injuries sustained in six seasons of National Collegiate Athletic Association men’s and  
360 women’s soccer (2009/2010–2014/2015). *Br J Sports Med* [Internet]. 2017;51:1029–34.  
361 Available from: <https://bjsm.bmj.com/lookup/doi/10.1136/bjsports-2015-095718>
- 362 21. Gerritsen H, Samim M, Peters H, Schers H, Laar F van de. Incidence, course and risk factors  
363 of head injury: a retrospective cohort study. *BMJ Open* [Internet]. 2018;8:e020364. Available  
364 from: <https://bmjopen.bmj.com/lookup/doi/10.1136/bmjopen-2017-020364>
- 365 22. Koreny M, Sterz F, Uray T, Schreiber W, Holzer M, Laggner A, et al. Effect of cooling after  
366 human cardiac arrest on myocardial infarct size. *Resuscitation.* 2009;80:56–60.
- 367 23. Ma R, Lopez V, Weinstein MG, Chen JL, Black CM, Gupta AT, et al. Injury Profile of  
368 American Women’s Rugby-7s. *Med Sci Sports Exerc.* Lippincott Williams and Wilkins;  
369 2016;48:1957–66.
- 370 24. Spano M, Risucci DA, Etienne M, Petersen KH. Epidemiology of sports related concussion  
371 in brazilian jiu-jitsu: A cross-sectional study. *Sports.* MDPI; 2019;7.
- 372 25. Wu V, Huff H, Bhandari M. Pattern of physical injury associated with intimate partner  
373 violence in women presenting to the emergency department: A systematic review and meta-

374 analysis. Trauma, Violence, Abus. 2010;11:71–82.  
375 26. Preiss-Farzanegan SJ, Chapman B, Wong TM, Wu J, Bazarian JJ. The Relationship Between  
376 Gender and Postconcussion Symptoms After Sport-Related Mild Traumatic Brain Injury. PM R.  
377 2009;1:245–53.  
378 27. Bazarian JJ, Blyth B, Mookerjee S, He H, McDermott MP. Sex differences in outcome after  
379 mild traumatic brain injury. J Neurotrauma. 2010;27:527–39.

380

381 **Figure legend**

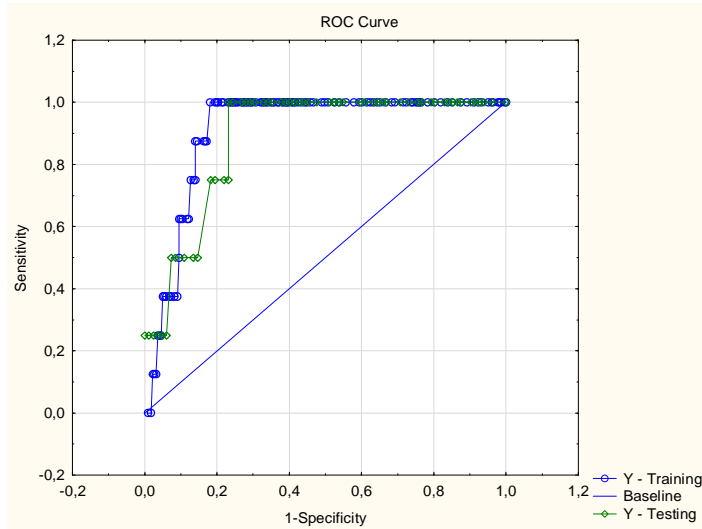

382

383 Figure 1: The results of ROC and AUC analysis on which the sample has been divided.

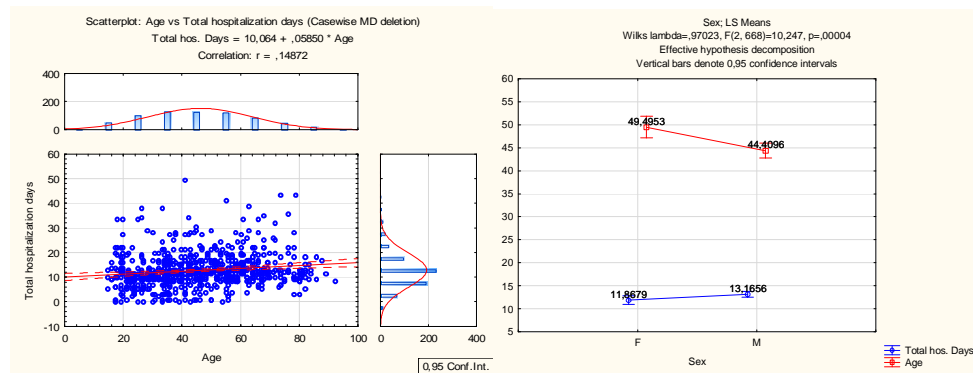

384

385 Figure 2: Graphical presentation of the direct association between the total hospitalization days  
386 and the age and the statistically significant difference in total hospitalization days between men  
387 and women sex of the patients.

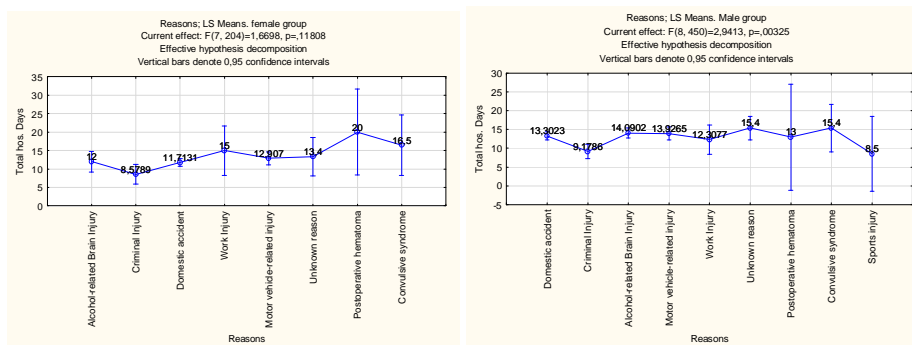

388

389 Figure 3: Total hospitalization days and etiology in men and women, respectively (in women  
390 statically, no significant different).

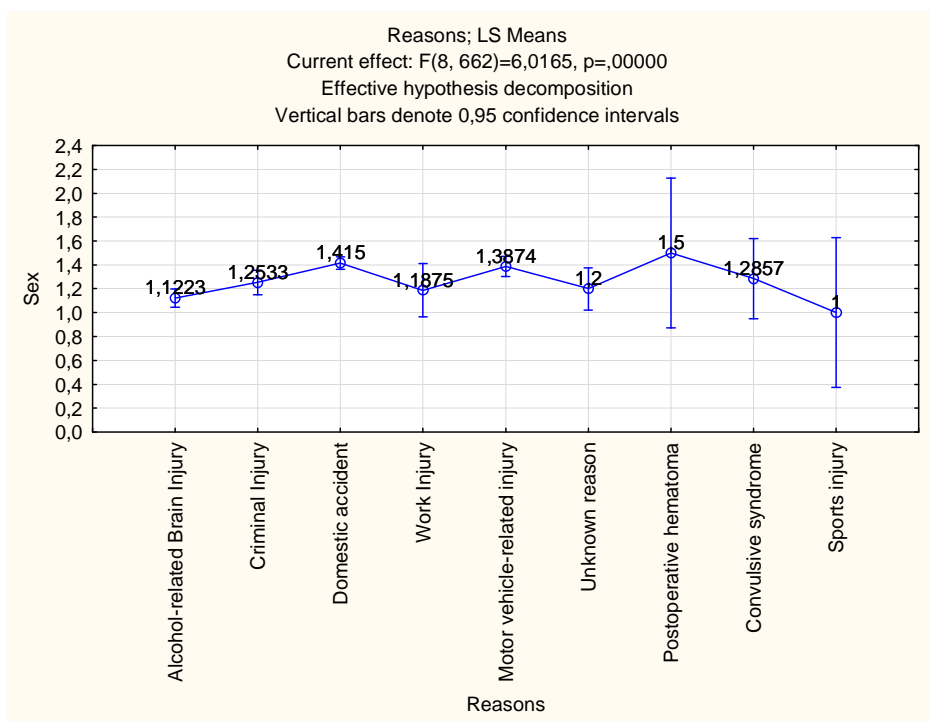

391

392

393 Figure 4: Graphical presentation of the risk markers in males and females in the republic. (The  
394 number 1 indicates males and number 2 indicates females; the nearest values to 1 demonstrates  
395 higher incidence in males and oppositely, the value nearest to 2, indicates higher incidence in  
396 female).

397
